# Supplementary material
Source: PubMed Central journal article supplement (PMC2777489)
Supplement: 00038.2009_1.pdf [file 00038.2009_1.pdf]

## Supplementary Figure 1. Annexin V binding to VVEC

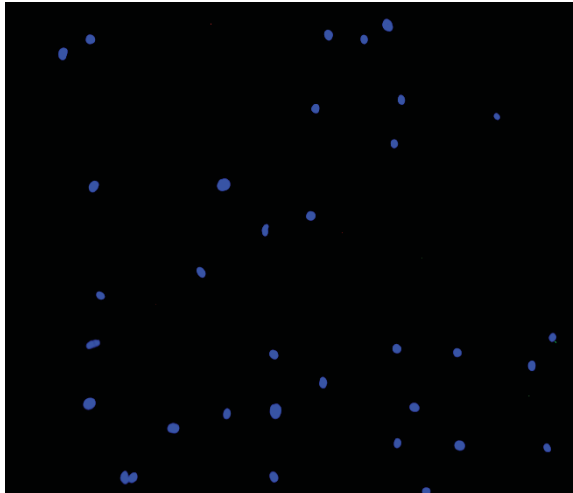

control

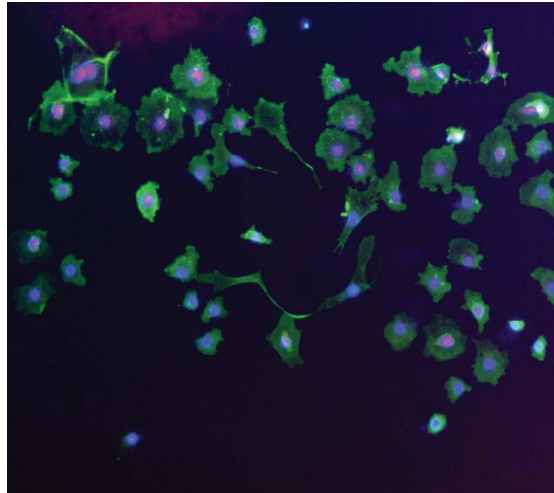

Staurosporin

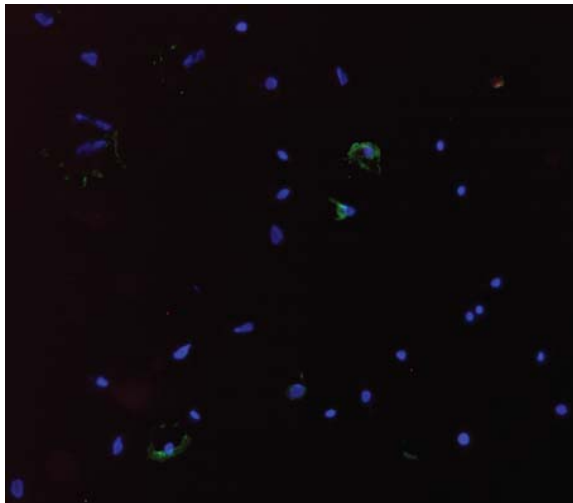

BTC3

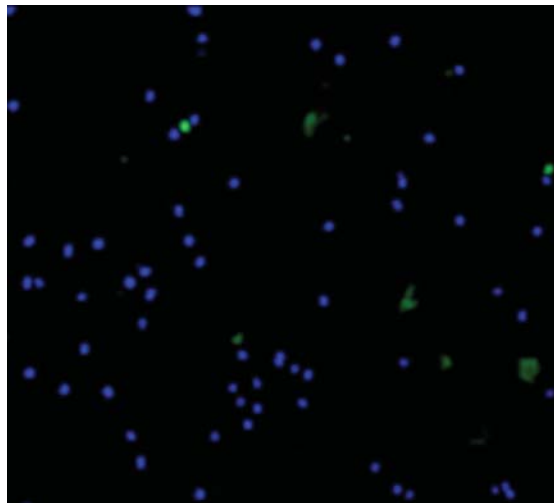

Y 27632

The VVEC were plated on 4 well chamber slides, treated with staurosporin (0.5  $\mu$ M, 3 hr – positive control); BTC3 (1  $\mu$ g/ml, 4 hr) and Y27632 (10  $\mu$ M, 24 hr). After that cells were fixed with 4% paraformaldehyde for 20 min and stained with FITC-Annexin V (Invitrogen) antibody at 1:500 dilution.

As shown in the Figure, after 3 hr treatment with staurosporin almost all VVEC undergo apoptosis, while 4 hour treatment with BTC3 resulted in ~12% of the cells undergoing apoptosis, and 24 hr treatment with Y27632 resulted in ~ 10% of the cells undergoing apoptosis (some green staining seen in the picture are false positives, since there are no nuclear in the green stained spots). Images were captured at X400 magnification (Carl Zeiss KS300) using AxioVision software.
