# Supplementary material
Source: PubMed Central journal article supplement (PMC2777489)
Supplement: 00038.2009_2.pdf [file 00038.2009_2.pdf]

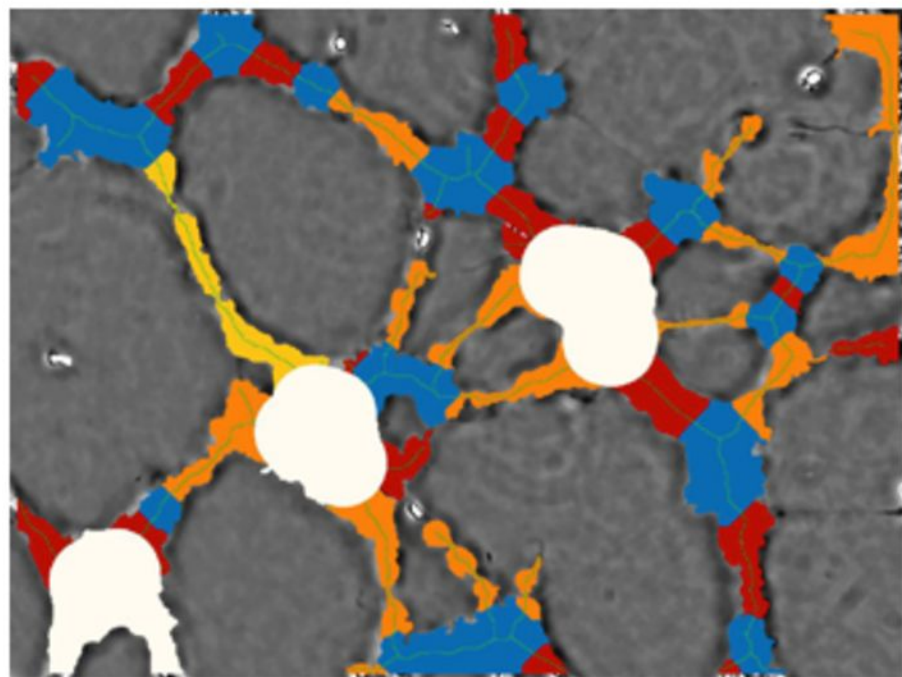

**Supplementary Figure 2.** Quantitative tube formation analysis with S.CORE software (S.CO LifeScience GmbH). Sample image shows ATP-treated VVEC.

Object oriented image analysis approach is based on the first-class Cognition Network Technology, S.CORE tube formation quantification analysis includes three aspects:

- 1. Single tube quality:** tubes are thin, long and linear
- 2. Confluent areas:** the more confluent areas with the less tube formation potential
- 3. Tube network:** the more complex the tube network with the more tube formation potential

All three aspects are integrated in the definition of the S.CORE Tube Formation Index.

S.CORE Tube Formation Index:  $(\text{Mean Tube Index})^2 \times (1 - \text{Confluent area}) \times (\text{No. branching points} / \text{Total length skeleton})$

On images, cellular parts are divided into 3 categories:

- Confluent Areas (white)
- Nodal structures (blue)
- Tubes (yellow, orange, red)

Total length of well-developed tubes (yellow, calculated in pixels [px]) is defined as total length of tubes with a high tube index

Total length of satisfactory-developed tubes (orange, calculated in pixels [px]) is defined as total length of tubes with a medium tube index

Total length of poorly-developed tubes (red, calculated in pixels in pixels [px]): is defined as total length of tubes with a low tube index
